# Supplementary material for: Facile and green synthesis of a hydrophilic imprinted resin in a deep eutectic solvent–water medium for the specific molecular recognition of tumor biomarkers in complex biological matrices
Source: Royal Society of Chemistry journal article supplement (doi:10.1039/d3gc04207c), 2023-12-21
Supplement: d3gc04207c1.pdf [file d3gc04207c1.pdf]

## Electronic supplementary information

### Facile and green synthesis of hydrophilic imprinted resin in deep eutectic solvents-water for specific molecular recognition of tumor biomarkers in complex biological matrices

Mingwei Wang<sup>a</sup>, Liang Zhou<sup>a</sup>, Fengxia Qiao<sup>c</sup>, Hongyuan Yan<sup>a,b\*</sup>

<sup>a</sup> Hebei Key Laboratory of Public Health Safety, College of Pharmaceutical Science, College of

Chemistry and Materials Science, Hebei University, Baoding 071002, China

<sup>b</sup> State Key Laboratory of New Pharmaceutical Preparations and Excipients, Key Laboratory of

Medicinal Chemistry and Molecular Diagnosis of Ministry of Education, Hebei University,

Baoding 071002, China

<sup>c</sup> College of Biochemical and Environmental Engineering, Baoding University, Baoding,

071002, China

---

\* Corresponding author. Tel./Fax: +86-312-5079788

E-mail address: yanhy@hbu.edu.cn

# Contents

**Chemicals and reagents**

**Characterization and analysis instruments**

**Adsorption experiments**

**Adsorption kinetics**

**Adsorption isotherms**

**Urine sample pretreatment procedure**

**Figures and Tables**

Fig. S1 Fourier-transform infrared spectroscopy (FTIR) spectra of HIR and HNIR.

Fig. S2 Pseudo-first-order (a) and Pseudo-second-order (b) kinetics models of HIR for adsorption of VMA and HVA.

Fig. S3 Pseudo-first-order (a) and Pseudo-second-order (b) kinetics models of HNIR for adsorption of VMA and HVA.

Fig. S4 Adsorption isotherm models of HIR for adsorption of VMA and HVA at different temperatures. (a) Langmuir linear fits for VMA; (b) Langmuir linear fits for HVA; (c) Freundlich linear fits for VMA; (d) Freundlich linear fits for HVA; (e) Tempkin linear fits for VMA; (f) Tempkin linear fits for HVA; (g) D - R linear fits for VMA; (h) D - R linear fits for HVA.

Fig. S5 Adsorption isotherm models of HNIR for adsorption of VMA and HVA at different temperatures. (a) Langmuir linear fits for VMA; (b) Langmuir linear fits for HVA; (c) Freundlich linear fits for VMA; (d) Freundlich linear fits for HVA; (e)

Tempkin linear fits for VMA; (f) Tempkin linear fits for HVA; (g) D - R linear fits for VMA; (h) D - R linear fits for HVA.

Fig. S6 The plots of  $\ln K_f$  versus  $1/T$  for VMA and HVA of HIR (a) and HNIR (b).

Fig. S7 High-resolution XPS spectra of HIR before adsorption of VMA, HVA (a) C1s, (b) O1s and after adsorption of VMA, HVA (c) C1s, (d) O1s.

Fig. S8 Effect factors of separation and extraction conditions study. (a) pH; (b) salt concentration; (c) adsorbent amount; (d) the kind of washing solvent (1.methanol; 2.acetonitrile; 3.acetone; 4.water; 5.methanol-water (1:1, v/v); 6.acetonitrile-water (1:1, v/v)); (e) the volume of washing solvent; (f) the kind of eluent (1.methanol-acetic acid (9:1, v/v); 2.methanol-formic acid (9:1, v/v); 3.acetonitrile-acetic acid (9:1, v/v); 4.acetonitrile-formic acid (9:1, v/v); 5.acetonitrile-ammonia water (9:1, v/v); 6.methanol-ammonia water (9:1, v/v)); (g) the volume of eluent).

Table S1. Lagergren pseudo-first-order and pseudo-second-order kinetics parameters of HIR for the adsorption of VMA and HVA.

Table S2. Lagergren pseudo-first-order and pseudo-second-order kinetics parameters of HNIR for the adsorption of VMA and HVA.

Table S3. Langmuir isotherm for the adsorption of analytes on HIR.

Table S4. Langmuir isotherm for the adsorption of analytes on HNIR.

Table S5. Freundlich isotherm for the adsorption of analytes on HIR.

Table S6. Freundlich isotherm for the adsorption of analytes on HNIR.

Table S7. Tempkin isotherm for the adsorption of analytes on HIR.

Table S8. Tempkin isotherm for the adsorption of analytes on HNIR.

Table S9. D-R isotherm for the adsorption of analytes on HIR.

Table S10. D-R isotherm for the adsorption of analytes on HNIR.

Table S11. Thermodynamics parameters for the adsorption of analytes on HIR.

Table S12. Thermodynamics parameters for the adsorption of analytes on HNIR.

Table S13. Methodology parameters of the HIR-SPE-HPLC.

Table S14. Spiked recovery of the HIR-SPE-HPLC method.

Table S15 Determination of VMA and HVA in urine samples.

## **Reference**

## **Chemicals and reagents**

Phloroglucinol was obtained from Macklin Chemical Co., Ltd. (Shanghai, China). Choline chloride, Phenylephrine hydrochloride, formic acid (HPLC grade), acetic acid (HPLC grade), vanillylmandelic acid (VMA), homovanillic acid (HVA),  $\beta$ -estradiol, florfenicol, thiamphenicol, sodium sulfadimethoxine were obtained from Aladdin Chemical Co., Ltd. (Shanghai, China). Hexamethylenetetramine was obtained from Huadong Chemical Co., Ltd. (Tianjin, China). 1,4-butanediol was purchased from Guangfu Chemical Co., Ltd. (Tianjin, China). Acetonitrile and methanol were obtained from Xingke Biochem Co., Ltd. (Shanghai, China).

## **Characterization and analysis instruments**

The characterization of the morphology of HIR and HNIR using scanning electron microscopy (SEM) with Phenom Pro SEM system (Phenom Pro Phenom, Netherlands).

Infrared spectra (IR) were recorded on a FTIR-850 fourier transform infrared spectrometer (Gangdong, China) in the range 500–4000  $\text{cm}^{-1}$ . Hydrophilic properties were obtained by water contact angle system (SZ-CAMB3, Xuanzhun, China). The specific surface area of HIR was measured by a TriStar II 3020 automated pore size and surface area analyzer (Micromeritics, Norcross, USA). The chromatographic analysis was performed using Vanquish<sup>TM</sup> Core HPLC system (Thermo Fisher Scientific, USA) with Accucore C<sub>18</sub> column (2.6  $\mu\text{m}$ , 4.6 mm  $\times$  100 mm, Thermo Fisher Scientific Co., Ltd). The mobile phase was water–acetonitrile (90:10, v/v, containing 0.1% formic acid in water) at a flow rate of 1.0  $\text{mL min}^{-1}$ . The wavelengths of the UV set at 206 nm. The injection volume of the sample was 20  $\mu\text{L}$ .

## Adsorption experiments

3 mg HIR was placed in different 10 mL centrifuge tubes with 2 mL of VMA and HVA mixed standard solution ( $40 \mu\text{g mL}^{-1}$ ). The tubes were placed in an oscillator shaking for 720 min at  $25 \text{ }^\circ\text{C}$  and 300 rpm. After centrifugation, the supernatant was taken and passed through a  $0.22 \mu\text{m}$  filter for HPLC analysis to determine the adsorption amounts of the HIR. The adsorption capacity ( $Q_e$ ) of HIR to VMA and HVA was calculated by the following equation (1):<sup>1</sup>

$$Q_e = \frac{(C_i - C_e) \times V}{W} \quad (1)$$

Where  $Q_e$  ( $\mu\text{g mg}^{-1}$ ) represents the adsorption amount of HIR,  $C_i$  ( $\mu\text{g mL}^{-1}$ ) is the initial concentration of VMA and HVA,  $C_e$  ( $\mu\text{g mL}^{-1}$ ) represents the concentration of VMA and HVA after reaching adsorption equilibrium,  $V$  (mL) is the volume of the solution,  $W$  (mg) is the amount of HIR.

## Adsorption kinetics

3 mg HIR and HNIR was placed in different 10 mL centrifuge tubes with 2 mL of VMA and HVA mixed standard solution ( $40 \mu\text{g mL}^{-1}$ ). The tube was placed in an oscillator and the adsorption time ranged from 0.5 min to 720 min at  $25 \text{ }^\circ\text{C}$  and 300 rpm. After centrifugation, the supernatant was taken and passed through a  $0.22 \mu\text{m}$  filter for HPLC analysis. The adsorption amounts of the HIR and HNIR was calculated as Eq. (1).

The adsorption kinetics data of HIR was fitted by pseudo-first-order kinetic model and pseudo-second-order kinetic model, and the adsorption mechanism of HIR was studied with Eq. (2) and Eq. (3), respectively.<sup>2</sup>

$$\ln(Q_e - Q_t) = \ln Q_e - k_1 t \quad (2)$$

$$\frac{t}{Q_t} = \frac{t}{Q_e} + \frac{1}{k_2 Q_e^2} \quad (3)$$

Where  $Q_t$  ( $\mu\text{g mg}^{-1}$ ) represents the amount of adsorption at time  $t$ , and  $Q_e$  ( $\mu\text{g mg}^{-1}$ ) represents the amount of adsorption at adsorption equilibrium.  $k_1$  ( $\text{min}^{-1}$ ) is the Lagergren pseudo-first-order rate constant of adsorption and  $k_2$  ( $\text{g mg}^{-1} \text{min}^{-1}$ ) is the pseudo-second-order rate constant of adsorption. The results for the HIR and HNIR were shown in Fig. S2 and S3, Table S1 and S2.

### Adsorption isotherms

HIR and HNIR (3 mg) was placed in different 10 mL centrifuge tubes, and 2 mL VMA and HVA mixed standard solution was added to the tubes at concentrations ranged from  $2 \mu\text{g mL}^{-1}$  to  $100 \mu\text{g mL}^{-1}$ . Then put the tubes into an oscillator under 300 rpm at 298 K, 308 K, 318 K for 720 min. The supernatant was taken and passed through a  $0.22 \mu\text{m}$  filter for HPLC analysis. The adsorption amounts of the HIR and HNIR were calculated as Eq. (1). The adsorption mechanism of HIR was analyzed using adsorption isotherms (Langmuir, Freundlich, Tempkin, and Dubin Radushkevich (D-R)) to investigate the adsorption process and mechanism of VMA and HVA on HIR.

The Langmuir adsorption model assumes that the surface of HIR contains uniform binding sites, and the adsorption of VMA and HVA by HIR is monolayer adsorption, and there is no interaction between the VMA and HVA. The linear equation of Langmuir's adsorption equation is shown in Eq. (4):<sup>3</sup>

$$\frac{C_e}{Q_e} = \frac{C_e}{Q_m} + \frac{1}{K_l Q_m} \quad (4)$$

Where  $Q_e$  ( $\mu\text{g mg}^{-1}$ ) is the adsorption capacity of HIR or HNIR when the adsorption equilibrium is reached, and  $C_e$  ( $\mu\text{g mL}^{-1}$ ) is the equilibrium concentration of VMA and HVA.  $Q_m$  ( $\mu\text{g mg}^{-1}$ ) is the monomolecular layer saturation adsorption capacity of VMA and HVA.  $K_l$  ( $\text{mL } \mu\text{g}^{-1}$ ) is the Langmuir adsorption equilibrium constant.

The Freundlich adsorption model describes that HIR's adsorption of VMA and HVA occurs on their heterogeneous surfaces and belongs to multimolecular layer adsorption. The adsorption capacity of VMA and HVA by HIR increases with the increase of their concentration. The linear equation of the Freundlich adsorption equation is shown in Eq. (5):<sup>4</sup>

$$\ln Q_e = \ln K_f + \frac{1}{n} \ln C_e \quad (5)$$

Where  $Q_e$  ( $\mu\text{g mg}^{-1}$ ) is the adsorption capacity of HIR and HNIR when the adsorption equilibrium is reached, and  $C_e$  ( $\mu\text{g mL}^{-1}$ ) is the equilibrium concentration of VMA and HVA.  $n$  and  $K_f$  are Freundlich constants related to the adsorption strength and capacity of HIR, respectively.  $n$  indicates the adsorption process of VMA and HVA by HIR, and the favorable adsorption condition is when  $n > 1$ .

The Tempkin isotherm model assumes a linear decrease in the adsorption heat of VMA and HVA in the adsorption layer of HIR, rather than a logarithmic decrease. The linear equation of the Tempkin adsorption equation is shown in Eq. (6):<sup>5</sup>

$$Q_e = B_T \ln A_T + B_T \ln C_e \quad (6)$$

Where  $Q_e$  ( $\mu\text{g mg}^{-1}$ ) is the adsorption capacity of HIR and HNIR when the adsorption



equilibrium is reached, and  $C_e$  ( $\mu\text{g mL}^{-1}$ ) is the equilibrium concentration of VMA and HVA.  $A_T$  ( $\text{mL mg}^{-1}$ ) is the Tempkin isotherm constant related to the maximum binding energy,  $B_T=R_T/b$ , where  $R$  represents the gas constant with a value of  $8.314$  ( $\text{J mol}^{-1} \text{K}^{-1}$ ),  $T$  represents the absolute temperature ( $K$ ), and  $b$  is the Tempkin constant ( $\text{J mol}^{-1}$ ), which is related to the adsorption heat.

The D-R model is used to study whether the adsorption process of HIR for VMA and HVA is physical or chemical adsorption, assuming that HIR does not have a uniform surface and a constant adsorption energy. The linear equation of the D-R adsorption equation are shown in Eq. (7), (8) and (9):<sup>6</sup>

$$\ln Q_e = \ln Q_m - \beta \varepsilon^2 \quad (7)$$

$$\varepsilon = RT \ln \left( 1 + \frac{1}{C_e} \right) \quad (8)$$

$$E = (2\beta)^{-0.5} \quad (9)$$

Where  $Q_e$  ( $\mu\text{g mg}^{-1}$ ) is the adsorption capacity of HIR and HNIR when the adsorption equilibrium is reached, and  $C_e$  ( $\mu\text{g mL}^{-1}$ ) is the equilibrium concentration of VMA and HVA,  $Q_m$  ( $\mu\text{g mg}^{-1}$ ) represents the maximum adsorption capacity.  $\beta$  is the constant related to the adsorption energy ( $\text{mol}^2 \text{J}^{-2}$ ) and  $\varepsilon$  is the Polanyi potential.  $E$  ( $\text{kJ mol}^{-1}$ ) is the average energy that can be calculated from Eq. (9). The value of  $E$  indicates whether the adsorption process of HIR is chemical or physical adsorption.  $E > 8 \text{ kJ mol}^{-1}$  indicates that the adsorption process of HIR is chemical adsorption, while  $E < 8 \text{ kJ mol}^{-1}$  indicates that the adsorption process of HIR is physical reaction.

The adsorption process and mechanism of prepared HIR on VMA and HVA can be studied by thermodynamic analysis. The main thermodynamic parameters are enthalpy

change ( $\Delta H$ ), entropy change ( $\Delta S$ ) and Gibbs free energy ( $\Delta G$ ), and the relevant calculation equations are as follows:<sup>7</sup>

$$K_c = Q_e / C_e \quad (10)$$

$$\ln K_c = -\frac{\Delta H}{RT} + \frac{\Delta S}{R} \quad (11)$$

$$\Delta G = \Delta H - T \Delta S \quad (12)$$

Where  $Q_e$  ( $\mu\text{g mg}^{-1}$ ) is the adsorption capacity of HIR and HNIR when the adsorption equilibrium is reached, and  $C_e$  ( $\mu\text{g mL}^{-1}$ ) is the equilibrium concentration of VMA and HVA.  $T$  is the system temperature,  $R$  represents the gas constant with a value of 8.314 ( $\text{J mol}^{-1} \text{K}^{-1}$ ).

### **Urine sample pretreatment procedure**

Urine samples from 10 healthy volunteers (4 females and 6 males) aged 20-30 years were collected for analysis. After the urine sample was repeatedly frozen and thawed for several times, the supernatant was obtained by high-speed centrifugation (10000 rpm for 10 min) and then the supernatant was taken and passed through a 0.22  $\mu\text{m}$  filter. The urine was then diluted to 10 times its original volume with water.

## Figures and Tables

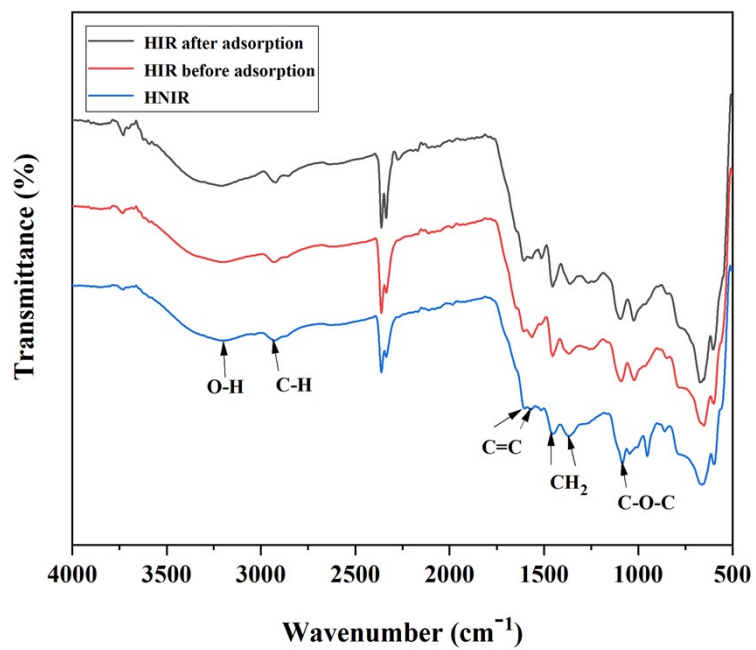

**Fig. S1** Fourier-transform infrared spectroscopy (FTIR) spectra of HIR and HNIR.

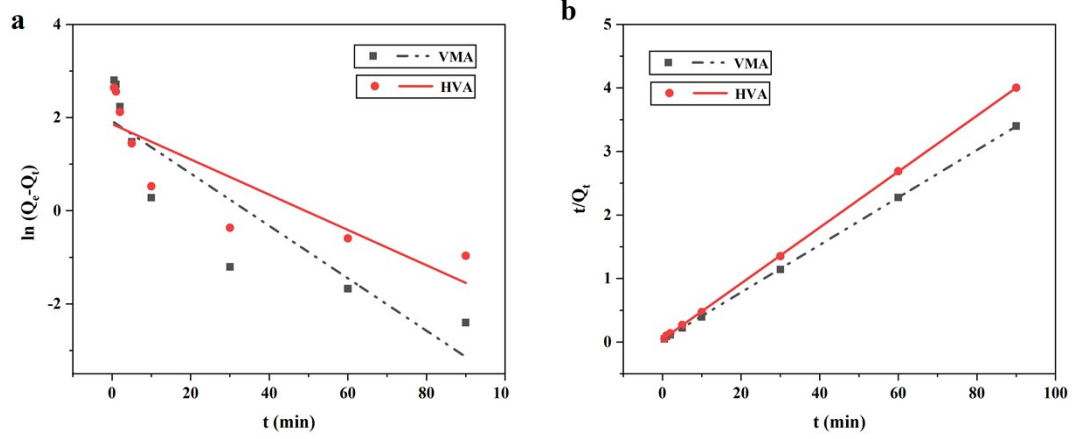

**Fig. S2** Pseudo-first-order (a) and Pseudo-second-order (b) kinetics models of HIR for adsorption of VMA and HVA.

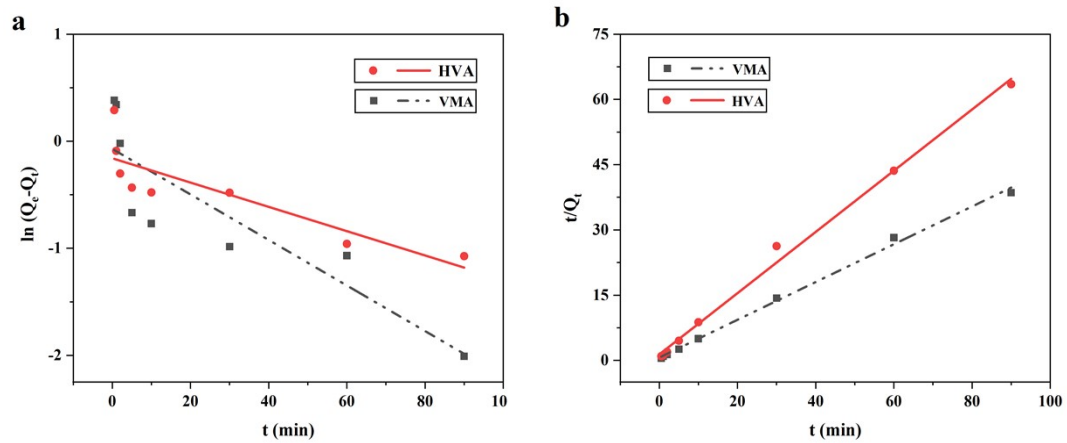

**Fig. S3** Pseudo-first-order (a) and Pseudo-second-order (b) kinetics models of HNIR for adsorption of VMA and HVA.

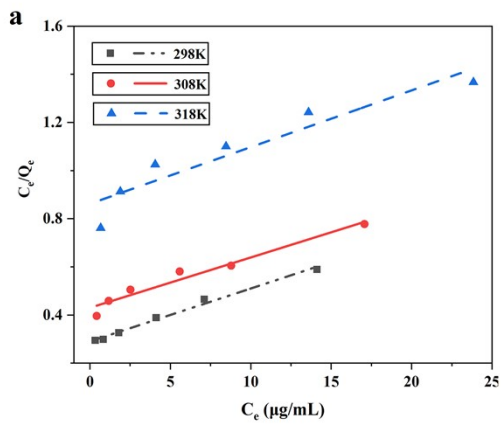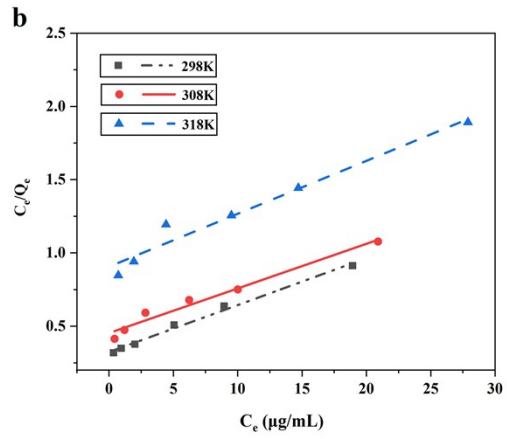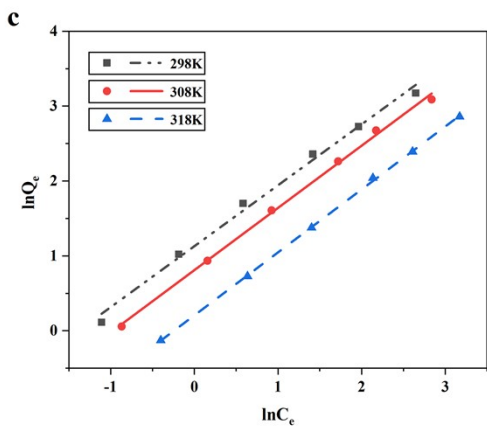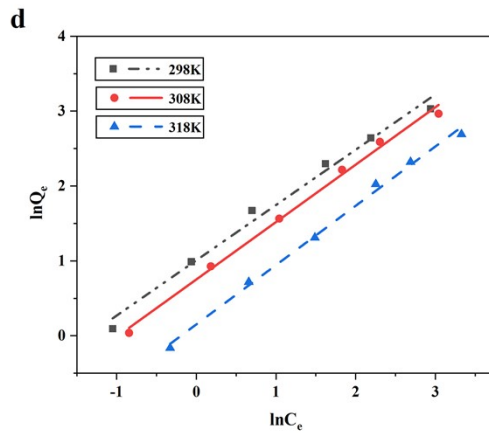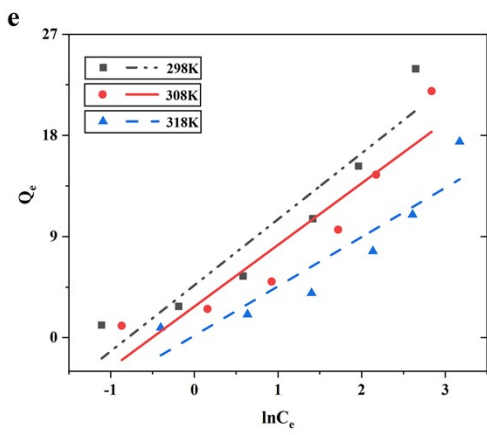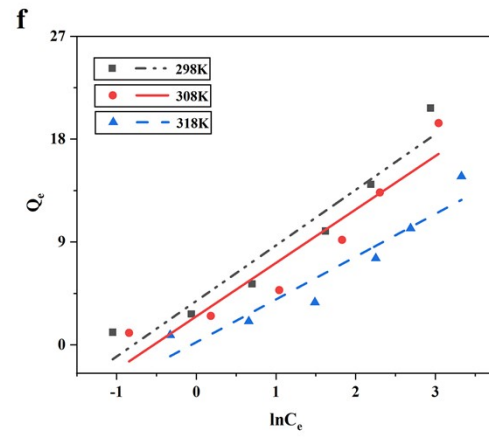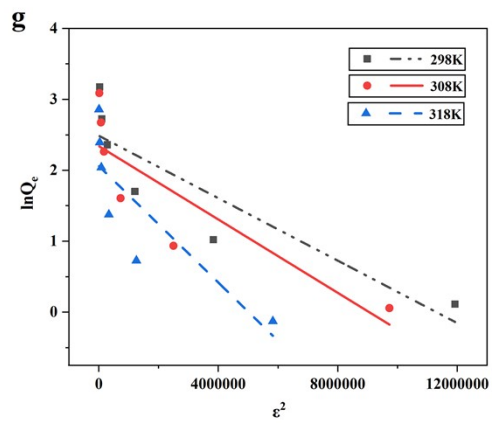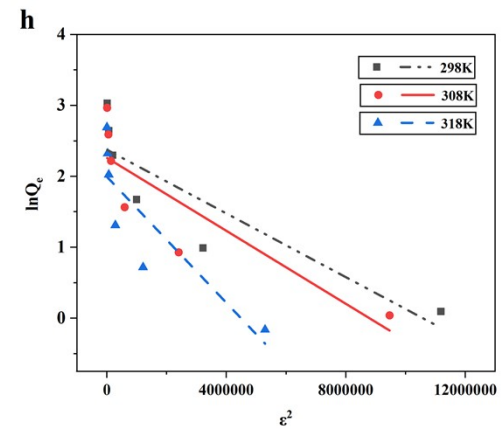

**Fig. S4** Adsorption isotherm models of HIR for adsorption of VMA and HVA at different temperatures. (a) Langmuir linear fits for VMA; (b) Langmuir linear fits for HVA; (c) Freundlich linear fits for VMA; (d) Freundlich linear fits for HVA; (e) Tempkin linear fits for VMA; (f) Tempkin linear fits for HVA; (g) D-R linear fits for VMA; (h) D-R linear fits for HVA.

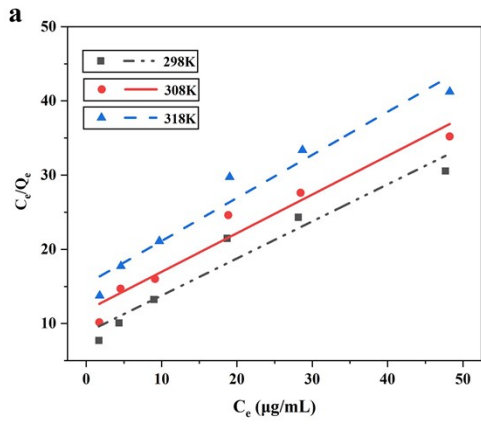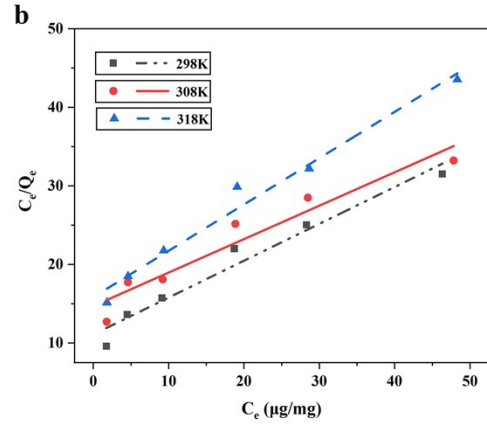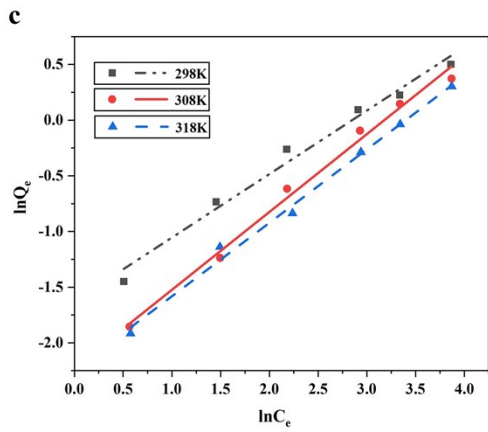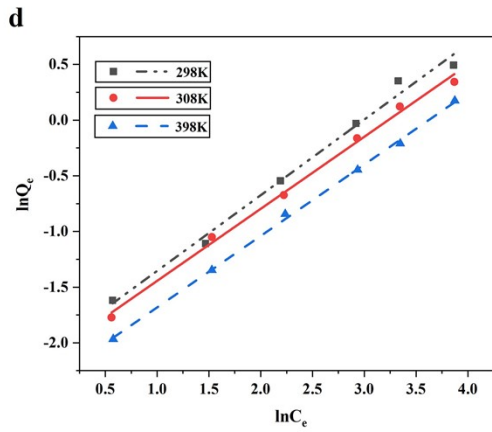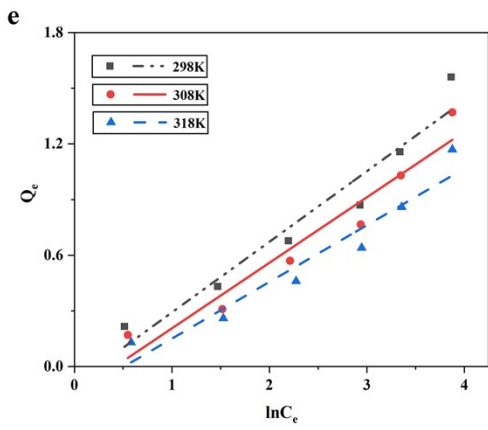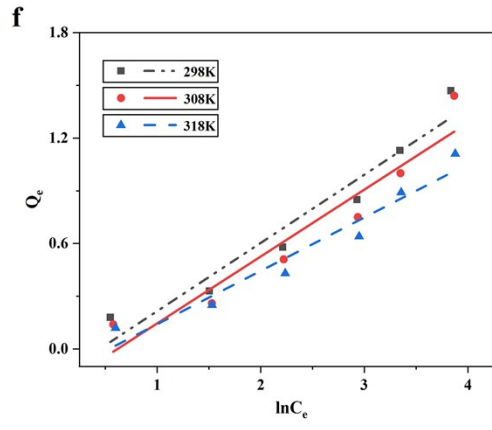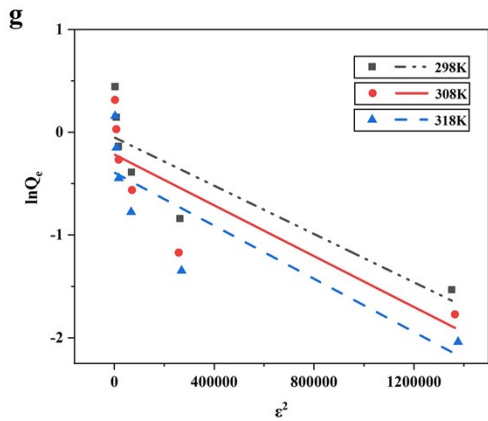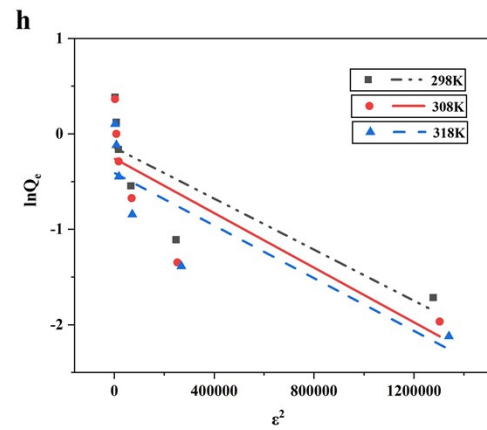



**Fig. S5** Adsorption isotherm models of HNIR for adsorption of VMA and HVA at different temperatures. (a) Langmuir linear fits for VMA; (b) Langmuir linear fits for HVA; (c) Freundlich linear fits for VMA; (d) Freundlich linear fits for HVA; (e) Tempkin linear fits for VMA; (f) Tempkin linear fits for HVA; (g) D-R linear fits for VMA; (h) D-R linear fits for HVA.

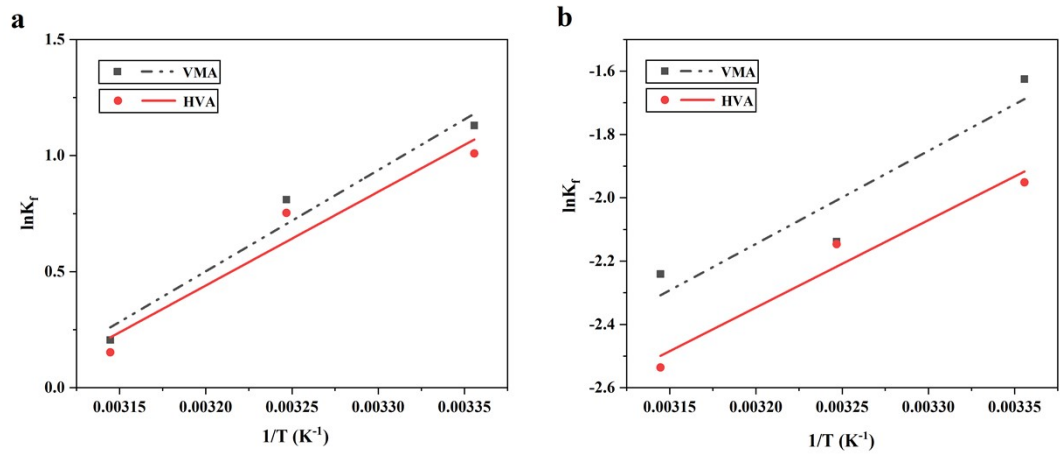

**Fig. S6** The plots of  $\ln K_f$  versus  $1/T$  for VMA and HVA of HIR (a) and HNIR (b).

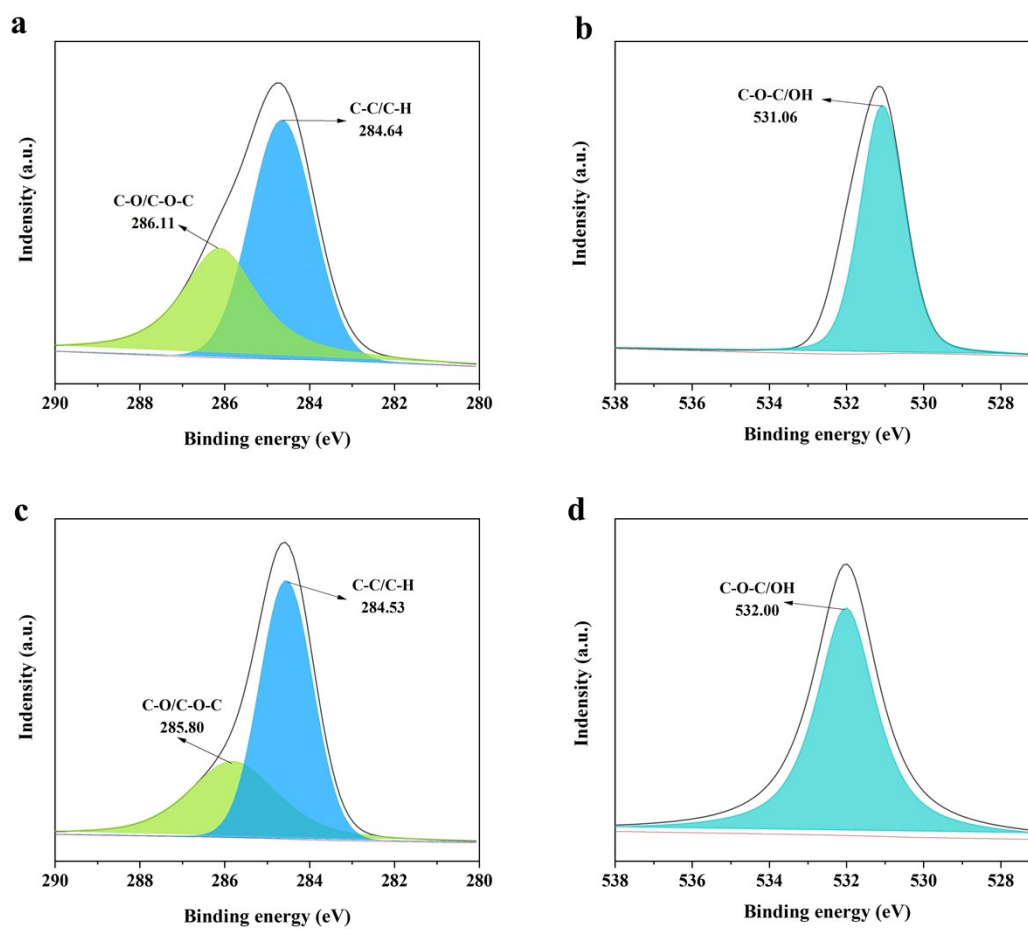

**Fig. S7** High-resolution XPS spectra of HIR before adsorption of VMA, HVA (a) C1s, (b) O1s and after adsorption of VMA, HVA (c) C1s, (d) O1s.

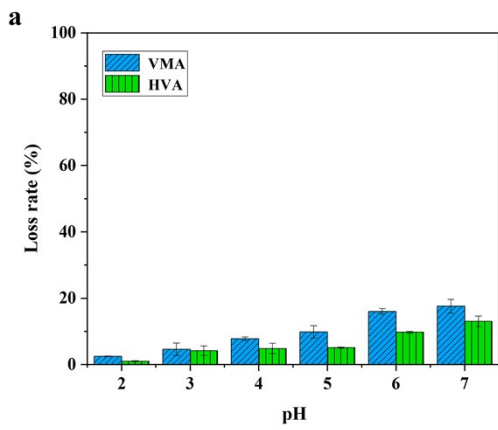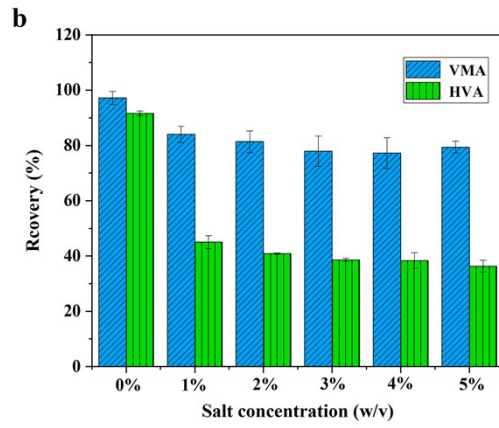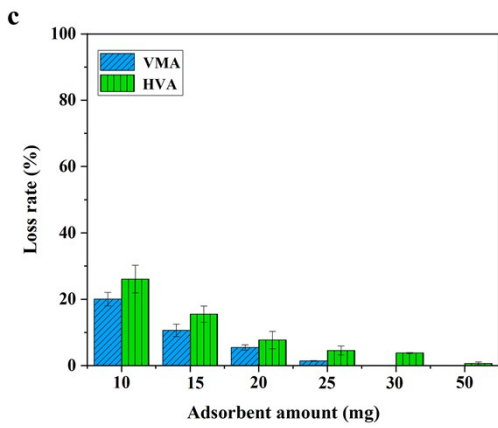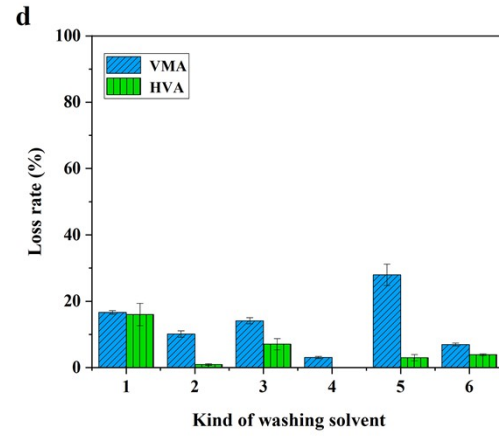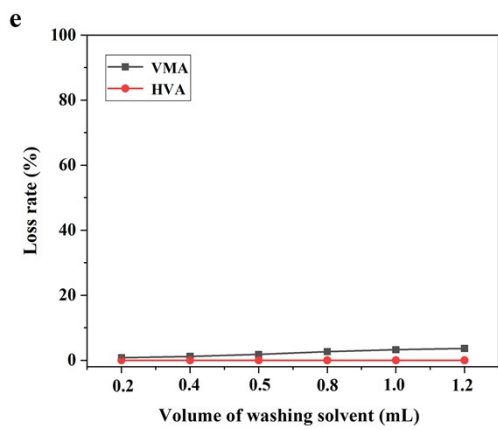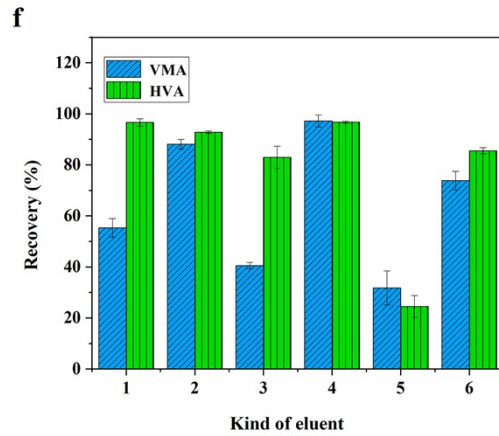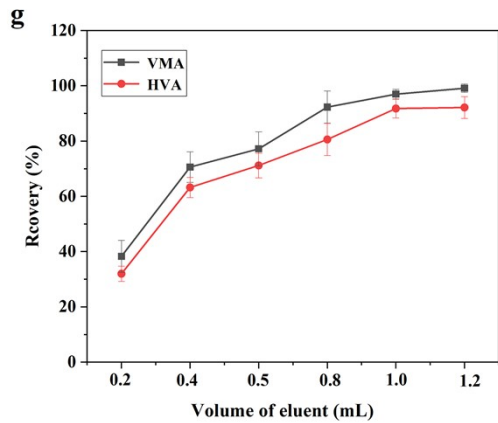

**Fig. S8** Effect factors of separation and extraction conditions study. (a) pH; (b) salt concentration; (c) adsorbent amount; (d) the kind of washing solvent (1.methanol; 2.acetonitrile; 3.acetone; 4.water; 5.methanol-water (1:1, v/v); 6.acetonitrile-water (1:1, v/v)); (e) the volume of washing solvent; (f) the kind of eluent (1.methanol-acetic acid (9:1, v/v); 2.methanol-formic acid (9:1, v/v); 3.acetonitrile-acetic acid (9:1, v/v); 4.acetonitrile-formic acid (9:1, v/v); 5.acetonitrile-ammonia water (9:1, v/v); 6.methanol-ammonia water (9:1, v/v)); (g) the volume of eluent).

**Table S1** Lagergren pseudo-first-order and pseudo-second-order kinetics parameters of HIR for

the adsorption of VMA and HVA

| Analyte | Pesudo-first-order         |                              |                | Pesudo-second-order        |                              |                |
|---------|----------------------------|------------------------------|----------------|----------------------------|------------------------------|----------------|
|         | $k_1$ (min <sup>-1</sup> ) | $Q_e$ (μg mg <sup>-1</sup> ) | R <sup>2</sup> | $k_2$ (min <sup>-1</sup> ) | $Q_e$ (μg mg <sup>-1</sup> ) | R <sup>2</sup> |
| VMA     | 0.0563                     | 6.8689                       | 0.7848         | 0.0340                     | 28.7935                      | 0.9999         |
| HVA     | 0.0379                     | 6.4408                       | 0.7034         | 0.0571                     | 20.0468                      | 0.9999         |

**Table S2** Lagergren pseudo-first-order and pseudo-second-order kinetics parameters of HNIR for the adsorption of VMA and HVA

| Analyte | Pseudo-first-order         |                              |                | Pseudo-second-order        |                              |                |
|---------|----------------------------|------------------------------|----------------|----------------------------|------------------------------|----------------|
|         | $k_1$ (min <sup>-1</sup> ) | $Q_e$ (μg mg <sup>-1</sup> ) | R <sup>2</sup> | $k_2$ (min <sup>-1</sup> ) | $Q_e$ (μg mg <sup>-1</sup> ) | R <sup>2</sup> |
| VMA     | 0.0213                     | 0.9329                       | 0.7324         | 0.2912                     | 2.3026                       | 0.9945         |
| HVA     | 0.0114                     | 0.8528                       | 0.7028         | 0.0688                     | 3.2469                       | 0.9965         |

**Table S3** Langmuir isotherm for the adsorption of analytes on HIR

| T (K) | Analyte | Langmuir constants             |                             |        |
|-------|---------|--------------------------------|-----------------------------|--------|
|       |         | $K_l$ (mL $\mu\text{g}^{-1}$ ) | $Q_e$ (mg $\text{g}^{-1}$ ) | $R^2$  |
| 298 K | VMA     | 0.0756                         | 45.4959                     | 0.9867 |
|       | HVA     | 0.0989                         | 31.2109                     | 0.9908 |
| 308 K | VMA     | 0.0485                         | 47.8469                     | 0.9492 |
|       | HVA     | 0.0671                         | 32.8407                     | 0.9679 |
| 318 K | VMA     | 0.0273                         | 42.4268                     | 0.8624 |
|       | HVA     | 0.0398                         | 27.6931                     | 0.9554 |



**Table S4** Langmuir isotherm for the adsorption of analytes on HNIR

| T (K) | Analyte | Langmuir constants             |                             |        |
|-------|---------|--------------------------------|-----------------------------|--------|
|       |         | $K_l$ (mL $\mu\text{g}^{-1}$ ) | $Q_e$ (mg $\text{g}^{-1}$ ) | $R^2$  |
| 298 K | VMA     | 0.0568                         | 2.0021                      | 0.9314 |
|       | HVA     | 0.0422                         | 2.1330                      | 0.9527 |
| 308 K | VMA     | 0.0442                         | 1.9201                      | 0.9434 |
|       | HVA     | 0.0289                         | 2.3513                      | 0.9112 |
| 318 K | VMA     | 0.0378                         | 1.7237                      | 0.9435 |
|       | HVA     | 0.0371                         | 1.6977                      | 0.9733 |

**Table S5** Freundlich isotherm for the adsorption of analytes on HIR

| T (K) | Analyte | Freundlich constants    |        |        |
|-------|---------|-------------------------|--------|--------|
|       |         | $K_f(\text{mg g}^{-1})$ | $n$    | $R^2$  |
| 298 K | VMA     | 3.0953                  | 1.2287 | 0.9919 |
|       | HVA     | 2.7429                  | 1.3546 | 0.9894 |
| 308 K | VMA     | 2.2483                  | 1.2032 | 0.9976 |
|       | HVA     | 2.1239                  | 1.3048 | 0.9940 |
| 318 K | VMA     | 1.2289                  | 1.1893 | 0.9996 |
|       | HVA     | 1.1652                  | 1.2631 | 0.9948 |

**Table S6** Freundlich isotherm for the adsorption of analytes on HNIR

| T (K) | Analyte | Freundlich constants    |        |        |
|-------|---------|-------------------------|--------|--------|
|       |         | $K_f(\text{mg g}^{-1})$ | $n$    | $R^2$  |
| 298 K | VMA     | 0.1969                  | 1.7533 | 0.9832 |
|       | HVA     | 0.1202                  | 1.4712 | 0.9910 |
| 308 K | VMA     | 0.1178                  | 1.4296 | 0.9918 |
|       | HVA     | 0.1169                  | 1.5453 | 0.9957 |
| 318 K | VMA     | 0.1064                  | 1.5157 | 0.9933 |
|       | HVA     | 0.0792                  | 1.5583 | 0.9988 |

**Table S7** Tempkin isotherm for the adsorption of analytes on HIR

| T (K) | Analyte | Tempkin constants |        |                |
|-------|---------|-------------------|--------|----------------|
|       |         | $A_T$             | $B_T$  | R <sup>2</sup> |
| 298 K | VMA     | 2.2096            | 5.8753 | 0.8775         |
|       | HVA     | 2.2014            | 4.8623 | 0.9108         |
| 308 K | VMA     | 1.6550            | 5.4868 | 0.8496         |
|       | HVA     | 1.7044            | 4.6755 | 0.8776         |
| 318 K | VMA     | 1.0416            | 4.3866 | 0.8239         |
|       | HVA     | 1.0625            | 3.7425 | 0.8803         |

**Table S8** Tempkin isotherm for the adsorption of analytes on HNIR

| T (K) | Analyte | Tempkin constants |        |                |
|-------|---------|-------------------|--------|----------------|
|       |         | $A_T$             | $B_T$  | R <sup>2</sup> |
| 298 K | VMA     | 0.7924            | 0.3805 | 0.9221         |
|       | HVA     | 0.6376            | 0.3879 | 0.9229         |
| 308 K | VMA     | 0.6591            | 0.3531 | 0.9222         |
|       | HVA     | 0.5329            | 0.3804 | 0.8917         |
| 318 K | VMA     | 0.6018            | 0.3056 | 0.9141         |
|       | HVA     | 0.5848            | 0.3036 | 0.9323         |

**Table S9** D-R isotherm for the adsorption of analytes on HIR

| T (K) | Analyte | D-R constants               |                             |                |
|-------|---------|-----------------------------|-----------------------------|----------------|
|       |         | $Q_e$ (mg g <sup>-1</sup> ) | $E$ (kJ mol <sup>-1</sup> ) | R <sup>2</sup> |
| 298 K | VMA     | 12.0480                     | 1.5073                      | 0.7555         |
|       | HVA     | 10.7743                     | 1.4923                      | 0.7448         |
| 308 K | VMA     | 10.4174                     | 1.3905                      | 0.6865         |
|       | HVA     | 9.6128                      | 1.3555                      | 0.6958         |
| 318 K | VMA     | 7.8744                      | 1.1033                      | 0.6424         |
|       | HVA     | 7.3672                      | 1.0611                      | 0.6760         |

**Table S10** D-R isotherm for the adsorption of analytes on HNIR

| T (K) | Analyte | D-R constants               |                             |                |
|-------|---------|-----------------------------|-----------------------------|----------------|
|       |         | $Q_e$ (mg g <sup>-1</sup> ) | $E$ (kJ mol <sup>-1</sup> ) | R <sup>2</sup> |
| 298 K | VMA     | 0.9511                      | 0.65243                     | 0.7046         |
|       | HVA     | 0.8663                      | 0.6222                      | 0.6494         |
| 308 K | VMA     | 0.8050                      | 0.6362                      | 0.6544         |
|       | HVA     | 0.7729                      | 0.5913                      | 0.6321         |
| 318 K | VMA     | 0.6756                      | 0.6221                      | 0.6797         |
|       | HVA     | 0.6646                      | 0.6021                      | 0.6926         |

**Table S11** Thermodynamics parameters for the adsorption of analytes on HIR

| Analyte | $\Delta H$ (kJ mol <sup>-1</sup> ) | $\Delta S$ (J mol <sup>-1</sup> K <sup>-1</sup> ) | $\Delta G$ (kJ mol <sup>-1</sup> ) |         |         | R <sup>2</sup> |
|---------|------------------------------------|---------------------------------------------------|------------------------------------|---------|---------|----------------|
|         |                                    |                                                   | 298K                               | 308K    | 318K    |                |
| VMA     | -36.2562                           | -0.1108                                           | -3.2229                            | -2.1141 | -1.0059 | 0.9252         |
| HVA     | -33.5668                           | -0.1037                                           | -2.6487                            | -1.6114 | -0.5736 | 0.8804         |



**Table S12** Thermodynamics parameters for the adsorption of analytes on HNIR

| Analyte | $\Delta H$ (kJ mol <sup>-1</sup> ) | $\Delta S$ (J mol <sup>-1</sup> K <sup>-1</sup> ) | $\Delta G$ (kJ mol <sup>-1</sup> ) |         |         | R <sup>2</sup> |
|---------|------------------------------------|---------------------------------------------------|------------------------------------|---------|---------|----------------|
|         |                                    |                                                   | 298K                               | 308K    | 318K    |                |
| VMA     | -24.4132                           | -0.0670                                           | -4.4472                            | -3.7772 | -3.1072 | 0.8825         |
| HVA     | -27.7819                           | -0.0772                                           | -4.7763                            | -4.0043 | -3.2323 | 0.9572         |

| Analytes | Regression equation | r      | Linearity                 | LOD                     | LOQ                     | RSD (%)   |           |
|----------|---------------------|--------|---------------------------|-------------------------|-------------------------|-----------|-----------|
|          |                     |        | ( $\mu\text{g mL}^{-1}$ ) | ( $\text{ng mL}^{-1}$ ) | ( $\text{ng mL}^{-1}$ ) | Intra-day | Inter-day |
| VMA      | $y=1.1389x+0.0094$  | 0.9999 | 0.05-150                  | 0.5                     | 1.5                     | 2.5       | 2.9       |
| HVA      | $y=1.0387x+0.0063$  | 0.9999 | 0.05-150                  | 1.0                     | 3.5                     | 1.4       | 1.7       |

**Table S13** Methodology parameters of the HIR-SPE-HPLC

**Table S14** Spiked recovery of the HIR-SPE-HPLC method

| Analytes | 2.0 ( $\mu\text{g mL}^{-1}$ ) |         | 10.0 ( $\mu\text{g mL}^{-1}$ ) |         | 100.0 ( $\mu\text{g mL}^{-1}$ ) |         |
|----------|-------------------------------|---------|--------------------------------|---------|---------------------------------|---------|
|          | Recovery (%)                  | RSD (%) | Recovery (%)                   | RSD (%) | Recovery (%)                    | RSD (%) |
| VMA      | 111.3                         | 7.8     | 101.4                          | 4.1     | 90.7                            | 3.2     |
| HVA      | 108.2                         | 5.3     | 92.6                           | 4.9     | 93.8                            | 4.9     |

**Table S15** Determination of VMA and HVA in urine samples

| Sample | VMA ( $\mu\text{g mL}^{-1}$ ) | HVA ( $\mu\text{g mL}^{-1}$ ) |
|--------|-------------------------------|-------------------------------|
| 1      | $0.62 \pm 0.08$               | $1.47 \pm 0.08$               |
| 2      | $0.71 \pm 0.07$               | $2.55 \pm 0.08$               |
| 3      | $0.17 \pm 0.04$               | $0.91 \pm 0.13$               |
| 4      | $0.88 \pm 0.08$               | $0.63 \pm 0.05$               |
| 5      | $0.28 \pm 0.03$               | $1.25 \pm 0.11$               |
| 6      | $0.44 \pm 0.07$               | $1.85 \pm 0.15$               |
| 7      | $0.59 \pm 0.03$               | $1.92 \pm 0.12$               |
| 8      | $0.38 \pm 0.03$               | $2.09 \pm 0.09$               |
| 9      | $0.54 \pm 0.04$               | $2.56 \pm 0.06$               |
| 10     | $1.42 \pm 0.11$               | $1.52 \pm 0.14$               |

## Reference

- 1 X. Zhong, Z. Lu, W. Liang and B. Hu, *J. Hazard. Mater.*, 2020, **393**, 122353.
- 2 X. Xie, X. Ma, L. Guo, Y. Fan, G. Zeng, M. Zhang and J. Li, *Chem. Eng. J.*, 2019, **357**, 56–65.
- 3 L. Wang, J. Li, J. Wang, X. Guo, X. Wang, J. Choo and L. Chen, *J. Colloid Interface Sci.*, 2019, **541**, 376–386.
- 4 A. Grover, I. Mohiuddin, A. K. Malik, J. S. Aulakh and K. H. Kim, *J. Cleaner Prod.*, 2019, **240**, 118090.
- 5 Q. Song, J. Liang, Y. Fang, C. Cao, Z. Liu, L. Li, Y. Huang, J. Lin and C. Tang, *J. Hazard. Mater.*, 2019, **364**, 654–662.
- 6 A. K. Priya, V. Yogeshwaran, S. Rajendran, T. K. A. Hoang, M. Soto-Moscoso, A. A. Ghfar and C. Bathula, *Chemosphere*, 2022, **286**, 131796.
- 7 F. Karimi, A. Ayati, B. Tanhaei, A. L. Sanati, S. Afshar, A. Kardan, Z. Dabirifar and C. Karaman, *Environ. Res.*, 2022, **203**, 111753.
